# Supplementary material for: Supply Chain Finance and Blockchain in Operations Management: A Literature Review
Source: MDPI journal article supplement (doi:10.3390/su142013450), 2022-10-18
Supplement: s1 [file s1]

## Supplementary files

**Table S1. Selected review papers.**

| No | Paper                      | Reference No. in the main text | Title                                                                                                                |
|----|----------------------------|--------------------------------|----------------------------------------------------------------------------------------------------------------------|
| 1  | Hofmann et al. (2017)      | [15]                           | Supply chain finance and blockchain technology: the case of reverse securitisation                                   |
| 2  | Omran et al. (2017)        | [16]                           | Blockchain-driven supply chain finance- Towards a conceptual framework from a buyer perspective                      |
| 3  | Bogucharskov (2018)        | [38]                           | Adoption of blockchain technology in trade finance process                                                           |
| 4  | Gao et al. (2018)          | [91]                           | A Real Time Stare in Market Strategy for Supply Chain Financing Pledge Risk Management                               |
| 5  | Liu et al. (2018)          | [40]                           | Framework design of financial service platform for tobacco supply chain based on blockchain                          |
| 6  | Mao et al. (2018)          | [90]                           | Credit evaluation system based on blockchain for multiple stakeholders in the food supply chain                      |
| 7  | Wang et al. (2018)         | [17]                           | Construction of VMI Mode Supply Chain Management System Based on Block Chain                                         |
| 8  | Zhu (2018)                 | [92]                           | The coordination mechanism of supply chain finance based on block chain                                              |
| 9  | Casino et al. (2019)       | [60]                           | Enhanced vendor-managed inventory through blockchain                                                                 |
| 10 | Chakraborty (2019)         | [63]                           | A Blockchain based Credit Analysis Framework for Efficient Financial Systems                                         |
| 11 | Dasaklis and Casino (2019) | [61]                           | Improving Vendor-managed Inventory Strategy Based on Internet of Things (IoT) Applications and Blockchain Technology |
| 12 | Li (2019)                  | [55]                           | A Simple Survey for Supply Chain Finance Risk Management with Applications of Blockchain                             |
| 13 | Liu and Song (2019)        | [43]                           | Research on Sustainability of Supply Chain Financial Model in Fujian Free Trade Zone                                 |
| 14 | Yaksick (2019)             | [59]                           | Overcoming Supply Chain Finance Challenges Via Blockchain Technology                                                 |
| 15 | Zhang et al. (2019)        | [18]                           | A study on SMIE credit evaluation model based on blockchain technology                                               |
| 16 | Zhu and Wang (2019)        | [93]                           | Research on Blockchain Application for E-Commerce, Finance and Energy                                                |
| 17 | Zou et al. (2019)          | [94]                           | Research on Blockchain-Based Commercial Paper Financing in Supply Chain                                              |
| 18 | Ali et al. (2020)          | [25]                           | The state of play of blockchain technology in the financial services sector A systematic literature review           |
| 19 | Chen (2020)                | [20]                           | A blockchain-driven supply chain finance application for auto retail industry                                        |
| 20 | Chod et al. (2020)         | [10]                           | On the Financing Benefits of Supply Chain Transparency and Blockchain Adoption                                       |

|    |                         |       |                                                                                                                                            |
|----|-------------------------|-------|--------------------------------------------------------------------------------------------------------------------------------------------|
| 21 | Choi (2020a)            | [21]  | Supply chain financing using blockchain impacts on supply chains selling fashionable products                                              |
| 22 | Choi (2020b)            | [22]  | Financing Product Development Projects in the Blockchain Era Initial Coin Offerings Versus Traditional Bank Loans                          |
| 23 | Choi et al. (2020)      | [34]  | Optimal pricing in on-demand-service-platform-operations with hired agents and risk-sensitive customers in the blockchain era              |
| 24 | Huang (2020)            | [99]  | Application and Challenge of Blockchain in Supply Chain Finance                                                                            |
| 25 | Jiang and Ru (2020)     | [98]  | Application of Blockchain Technology in Supply Chain Finance                                                                               |
| 26 | Lahkani et al. (2020)   | [47]  | Sustainable B2B E-commerce and blockchain-based supply chain finance                                                                       |
| 27 | Safiullin et al. (2020) | [56]  | Assessing the impact of supply chain financing using blockchain technology on credit risks in the banking sector of the Russian Federation |
| 28 | Su and Wang (2020)      | [23]  | Case Study of How to Help Manufacturing Enterprises Obtain Loan Through Supply Chain Documents on Blockchain Platform                      |
| 29 | Su et al. (2020)        | [97]  | Research of Innovative Business Classification in Bulk Commodity Digital Supply Chain Finance                                              |
| 30 | Tang and Zhuang (2020)  | [95]  | Financing a capital-constrained supply chain factoring accounts receivable vs a BCT-SCF receivable chain                                   |
| 31 | Wang et al. (2020)      | [96]  | A Survey of the Application of Blockchain in Multiple Fields of Financial Services                                                         |
| 32 | Zheng (2020)            | [19]  | Blockchain-based intelligent contract for factoring business in supply chains                                                              |
| 33 | Chen et al. (2021)      | [103] | Applying blockchain technology to reshape the service models of supply chain finance for SMEs in China                                     |
| 34 | Choi (2021)             | [33]  | Creating all win by blockchain technology in supply chains Impacts of agents risk attitudes towards cryptocurrency                         |
| 35 | Dong et al. (2021)      | [35]  | Operations strategy for supply chain finance with asset-backed securitization Centralization and blockchain adoption                       |
| 36 | Kabir and Islam (2021)  | [104] | Application of Blockchain for Supply Chain Financing Explaining the Drivers Using SEM                                                      |
| 37 | Liu et al. (2021a)      | [100] | Mitigating information asymmetry in inventory pledge financing through the Internet of things and blockchain                               |
| 38 | Liu et al. (2021b)      | [36]  | Optimal strategies for financing a three-level supply chain through blockchain platform finance                                            |
| 39 | Meng and Du (2021)      | [108] | Zheshang Bank's blockchain + Supply Chain Finance Accounts Receivable Financing Model of Research                                          |
| 40 | Ning and Yuan (2021)    | [101] | How blockchain impacts the supply chain finance platform business model reconfiguration                                                    |
| 41 | Rijanto (2021)          | [102] | Blockchain Technology Adoption in Supply Chain Finance                                                                                     |

|    |                      |       |                                                                                                                  |
|----|----------------------|-------|------------------------------------------------------------------------------------------------------------------|
| 42 | Sun et al. (2021)    | [105] | Evolutionary Game Analysis of Blockchain Technology Preventing Supply Chain Financial Risks                      |
| 43 | Wang (2021a)         | [106] | Research on Supply Chain Financial Risk Assessment Based on Blockchain and Fuzzy Neural Networks                 |
| 44 | Wang (2021b)         | [109] | Application of blockchain technology in supply chain finance of Beibu Gulf Region                                |
| 45 | Wang et al. (2021a)  | [37]  | Value creation in blockchain-driven supply chain finance                                                         |
| 46 | Wang et al. (2021b)  | [110] | Research on Construction of Supply Chain Financial Platform Based on Blockchain Technology                       |
| 47 | Xie and Li (2021)    | [111] | Risk Analysis of Supply Chain Finance under Blockchain Technology - Based on AHP-FCM Model                       |
| 48 | Xu et al. (2021)     | [107] | Research on the Influence Mechanism of Block Chain on the Credit of Transportation Capacity Supply Chain Finance |
| 49 | Yao and Qin (2021)   | [112] | Block Chain Based Supply Chain Financial Risk Management Research                                                |
| 50 | Yu et al. (2021)     | [24]  | Financing strategy analysis for a multi-sided platform with blockchain technology                                |
| 51 | Zhang et al. (2021a) | [113] | Analysis of supply chain finance based on blockchain                                                             |
| 52 | Zhang et al. (2021b) | [114] | Supply chain finance based on smart contract                                                                     |

**Table S2 Challenges in the traditional SCF**

| Challenges                           | Proof quotes                                                                                                                                                                                                                                                                                                                                                                                                                                                                                                                                 | Supporting references          |
|--------------------------------------|----------------------------------------------------------------------------------------------------------------------------------------------------------------------------------------------------------------------------------------------------------------------------------------------------------------------------------------------------------------------------------------------------------------------------------------------------------------------------------------------------------------------------------------------|--------------------------------|
| <b>Integration</b>                   | “Implementing trade financing exerts great efforts in integrating related processes with finance, procurement, IT departments of organizations along supply chain.” [38]                                                                                                                                                                                                                                                                                                                                                                     | [16, 19, 38]                   |
| <b>Coordination</b>                  | “Stakeholders in trade finance have independent objectives of profit maximization regarding to different organizational structures, costs, and risks, which gives rise to poor performance of entire supply chain.” [38]<br>“Focal enterprises with strong competitiveness and voice play a key role in coordinating information flow, physical flow, financial flow, and business flow, leading to inequality and information asymmetry.” [42]<br>“SMEs always bear a long term of payment delay, which harms their assets’ liquidity.” 55] | [16, 38, 42, 43,55, 59]        |
| <b>Invoice fraud/ Data tampering</b> | “Paper-based debit notes, contracts, and warehouse receipts are faced with the risk of tampering.” [20]<br>“Fraudulent trade financing and double financing resulted from asymmetry information damage the mutual trust among stakeholders in SCF, which impedes integrated management and warehouse supervision.” [42]<br>“There is a lack of risk control before financing among the existing risk management research.” 55]                                                                                                               | [20, 23, 41, 42, 55,56,64, 65] |

|                             |                                                                                                                                                                                                                                                                                                                                                                               |                              |
|-----------------------------|-------------------------------------------------------------------------------------------------------------------------------------------------------------------------------------------------------------------------------------------------------------------------------------------------------------------------------------------------------------------------------|------------------------------|
| <b>Lack of trust</b>        | “Although having trusted intermediaries, the centralized SCF platforms still face problems such as information abuse, transaction unverifiable, and etc.” [20]                                                                                                                                                                                                                | [16, 20, 57,64, 65]          |
| <b>High cost</b>            | “Performing efficient supervision and verifying the authenticity of invoices are costly.” [20]<br>In SCF businesses, there are several intermediaries, leading to transactional risks, high costs, and low efficiency. [40]<br>“As costs in document auditing, risk control, and operations are high, it is hard for financial institutions to full participate in SCF.” [55] | [16, 20, 40, 55]             |
| <b>Double financing</b>     | One type of financial fraud that arouses widespread attention is double financing, where the enterprise sells the same invoice to two or more financial institutions. [41]                                                                                                                                                                                                    | [15, 20, 23, 41, 42, 44, 65] |
| <b>Default</b>              | The buyers may refuse to pay the invoice on the due date deliberately. [41]                                                                                                                                                                                                                                                                                                   | [41]                         |
| <b>Financing difficulty</b> | “As the cable manufacturing belongs to mass production, railway company will not issue confirmation documents for the cable enterprise to get loans.” [23]<br>The financing needs of a large number of lower-tier supplier and distributors are still unable to meet. [55]<br>“Financing difficulty is the huge obstacle to the development of SMEs.” [51]                    | [16, 18, 19, 23, 43, 46, 55] |
| <b>Regulation</b>           | “Regulation over intermediaries is chaos, resulting in the unbalanced resource allocation and the waste of resources.” [43]                                                                                                                                                                                                                                                   | [43]                         |

---

**Table S3 Drivers of blockchain adoption**

| Drivers                  | Proof quotes                                                                                                                                                                                                                                                                                                                                                                                                                                                                                                                                                                                                                                         | Supporting references                                    |
|--------------------------|------------------------------------------------------------------------------------------------------------------------------------------------------------------------------------------------------------------------------------------------------------------------------------------------------------------------------------------------------------------------------------------------------------------------------------------------------------------------------------------------------------------------------------------------------------------------------------------------------------------------------------------------------|----------------------------------------------------------|
| Cost reduction           | <p>“The analysis about the operational data indicates that the platform enables significant decrease in the cost of financing [...]”[20]</p> <p>“Therefore, existing financial services can be strengthened by blockchain systems that provide lower costs for financial institutions.” [47]</p>                                                                                                                                                                                                                                                                                                                                                     | [16, 18, 19, 20, 47, 59, 60]                             |
| Business efficiency      | <p>“These vehicles can be identified and supervised uniquely, for example, automation program based on smart contracts...” [20]</p> <p>“Automatic cycle management through smart contracts can simplify the business process of accounts receivable factoring and improve efficiency.” [42]</p> <p>Financial institutions can use information of related enterprises recorded on chain to do assessment and decide whether to finance the enterprises. [55]</p> <p>“In the case of Alibaba’ supply chain, the deployment of blockchain improves the efficiency of logistics and digital documentation, reaching 74% and 75%, respectively.” [47]</p> | [16, 18, 19, 20, 23, 40, 42, 43, 47, 55, 56, 57, 59, 60] |
| Trust building           | <p>The authenticity of information flow and physical flow can be ensured by combining the blockchain platform with IoT and RFID. [23]</p> <p>“Blockchain platform records all the verifiable data, which enables trading history assessment based on trustable information. Consequently, counterparty risks that banks concern about can be reduced.” [39]</p> <p>“The blockchain-enabled platform provides the real-time visibility and traceability for the pledges.” [45]</p>                                                                                                                                                                    | [16, 17, 18, 19, 23, 39, 43, 45, 57, 60, 65, 90]         |
| Easy access to financing | <p>“Financial companies have access to the daily production and business data of the cable company, due to the layout of IoT and digital documentations recorded through blockchain.” [23]</p>                                                                                                                                                                                                                                                                                                                                                                                                                                                       | [16, 18, 19, 23]                                         |

**Table S4 Barriers of blockchain adoption**

| Barriers               | Proof quotes                                                                                                                                                                                                                                                                                                                                                                                                                                                                                   | Supporting references |
|------------------------|------------------------------------------------------------------------------------------------------------------------------------------------------------------------------------------------------------------------------------------------------------------------------------------------------------------------------------------------------------------------------------------------------------------------------------------------------------------------------------------------|-----------------------|
| Cybersecurity          | <p>“Blockchain suffers from a 51% attack owing to the collusion from participants.” [38]</p> <p>“There are many possible types of common security breaches existed in blockchain, including DDoS attacks, private account hacking using Trojan horses, viruses from ads, 51% attack, data malleability problem, authentication and cryptography issues.” [45]</p>                                                                                                                              | [38, 45]              |
| Non-supervision        | <p>Although transactions can be executed by smart contracts automatically without manpower, there are indeed many situations that may need mediation from outside the network. [38]</p>                                                                                                                                                                                                                                                                                                        | [38]                  |
| Privacy disclosure     | <p>“Privacy disclosure is also a major problem in SCF, where manufacturers’ financing quotas, order quantities, prices, etc., are all business secrets.” [42]</p> <p>“The blockchain technology enables transaction data to be credible and transparent, however, it also increases the risk of disclosing enterprise business privacy[46]</p> <p>“Enterprises are worried that transparency without effective data privacy protection mechanism may harm their business advantages.” [47]</p> | [39, 42, 46, 47, 65]  |
| Cost                   | <p>Resistance to the transition to blockchain technology is related to costs.” [47]</p>                                                                                                                                                                                                                                                                                                                                                                                                        | [47]                  |
| Fraudulent source data | <p>The fraudulent source data may hinder the adoption of blockchain in SCF, because they are immutable once recorded on chain. [45]</p>                                                                                                                                                                                                                                                                                                                                                        | [45]                  |
| Policies               | <p>Weak contract institution, tax, legal systems, and regulations hinder effective interaction and standard procedures among supply chain partners. [16]</p>                                                                                                                                                                                                                                                                                                                                   | [16]                  |
| Lack of knowledge      | <p>Limited technical expertise and knowledge of using blockchain technology act as a barrier of adoption this new technology into the supply chain. [10]</p>                                                                                                                                                                                                                                                                                                                                   | [10, 48, 51]          |

**Table S5 Other technologies in blockchain adoption in SCF**

| Technology | Proof quotes                                                                                                                                                                                                                                                                                                                                                                                                                                                             | Supporting references    |
|------------|--------------------------------------------------------------------------------------------------------------------------------------------------------------------------------------------------------------------------------------------------------------------------------------------------------------------------------------------------------------------------------------------------------------------------------------------------------------------------|--------------------------|
| IoT        | <p>“Other solutions, such as the IBM’s autonomous decentralized peer-to-peer telemetry (ADEPT), propose an even higher integration level by combining internet of things (IoT) with BCTs.” [15]</p> <p>“BCautoSCF is driven by IoT and BCT, where IoT is employed to facilitate data acquisition [...]”[20]</p> <p>“The blockchain technology system is no longer limited to digital currency and has begun to be applied to the Internet of things (IoT) [...]”[42]</p> | [15, 20, 23, 42, 54, 64] |
| RFID       | <p>“Core physical and virtual infrastructures are needed to construct the platform, including blockchain implementation, IoTs, GPS, RFID, image recognition [...]” [20]</p>                                                                                                                                                                                                                                                                                              | [15, 20, 23]             |
| GPS        | <p>“Core physical and virtual infrastructures are needed to construct the platform, including blockchain implementation, IoTs, GPS, RFID, image recognition [...]” [20]</p>                                                                                                                                                                                                                                                                                              | [20]                     |
| AI         | <p>“Core physical and virtual infrastructures are needed to construct the platform, including blockchain implementation, IoTs, GPS, RFID, image recognition [...]” [20]</p> <p>Artificial intelligence, combined with BCT, could then be proactively used to identify when and where money-laundering activities are most likely to emerge. [59]</p>                                                                                                                     | [20, 45, 59, 90]         |
| ERP        | <p>“Certain forms of automation already exist with the self-billing procurement model, which can be deployed in the large ERP systems.” [15]</p> <p>“Alternatively, other firms are developing tools to integrate particular ERP systems with distributed ledgers.” [54]</p>                                                                                                                                                                                             | [15, 54]                 |
| EDI        | <p>“For instance, such a configuration might capture orders, in the same way that electronic data interchange (EDI) can be used to capture orders.” [54]</p>                                                                                                                                                                                                                                                                                                             | [54]                     |
